# Supplementary material for: Multifractal behaviour of the soil water content of a vineyard in NW Spain during two growing seasons
Source: Copernicus journal article supplement (doi:10.5194/npg-2016-14), 2016-02-23

Leiro, 23.06.2016

Dr. Antonio Paz González  
Editor Special Issue “Multifractal Analysis in Soil Systems”  
Nonlinear Processes in Geophysics

Subject: Submission of revised manuscript to *Nonlinear Processes in Geophysics*

Dear Editor,

On behalf of all authors, I would like to submit the following manuscript entitled: “Multifractal behaviour of the soil water content of a vineyard in NW Spain during two growing seasons”, by José Manuel **Mirás-Avalos**, Emiliano **Trigo-Córdoba**, Rosane **da Silva-Dias**, Irene **Varela-Vila**, and Aitor **García-Tomillo**.

We thank all the comments and suggestions posed by the reviewers. All comments were taken into account and changes according to them were performed throughout the text. A specific answer to all the reviewers’ comments is provided at the end of this letter. Besides, we moved a table and two figures to supplementary materials in order to alleviate manuscript length. We also corrected several mistakes in the reference list.

We hope that, at its present form, our manuscript would reach the high quality standards for publication on *Nonlinear Processes in Geophysics*.

Looking forward to hearing from you.

Sincerely yours,

*José Manuel Mirás Avalos*

Researcher

Estación de Viticultura e Enoloxía de Galicia (EVEGA)

Ponte San Clodio s/n, 32428, Leiro (Ourense, Spain)

Email: [jose.manuel.miras.avalos@xunta.es](mailto:jose.manuel.miras.avalos@xunta.es)

Reviewer: 1 (M.G. Wilson)

This paper is precise and concrete. The paper describes dynamics of soil water content and considers the multifractality of these time data series of a vineyard in NW Spain. The paper is showing scaling properties of soil water content time series, these properties were different for the rain-fed and irrigation use, and higher heterogeneity under irrigation conditions

*Thank you very much for your comment, Dr. Wilson.*

Reviewer: 2

The aim of this paper is to describe soil water dynamics in vineyard and to assess multifractality. This topic is very interesting, because there is no application of multifractality to the temporal evolution of the soil water content in vineyard under two different water supply methods. This paper presents on an interesting subject and well written. The multifractality is analysed using the classical method of moments A question will be if the authors have detected the effects of seasonal trend on the multifractal analysis

*Thank you very much for your comments. Regarding your question about the effects of seasonal trend on the multifractal analysis, we are not sure about what you mean. If you refer to differences in multifractal parameters from one season to the other; we addressed this on the former version by stating that “2012 data series presented a higher heterogeneity than those from 2011” (page 8, lines 13-14). In the current version of the manuscript we added “Moreover, the width of the Dq spectra increased from 2011 to 2012 in both treatments, mainly in the 20 and 40 cm depths” (page 8, lines 27-28). We also added “Our results showed that the width of the singularity spectra increased in both treatments from 2011 to 2012 (Table 2)” (page 9, lines 26-27). Finally, in the conclusions section, we added “, which tended to increase in the second year of the study (2012)” (page 10, lines 21-22). We hope that these additions answer your question.*

Specific and technical comments

Page 3 line 18 when calculating the soil water budget would have to take into account both the interception, and surface storage, and consider surface runoff

*Yes, you are right, but we did not consider surface runoff because it was negligible on the studied plot. Surface storage and water interception by the canopy were not accounted for because our objective was not calculate a precise soil water budget but provide irrigation according to midday stem water potential readings and crop evapotranspiration, as described in this portion of the manuscript.*

Page Line 16 “0.4 mg of suspended soils”, units must be mg/l or other concentration units.

*Yes, you are right, it is mg/L. We corrected it in the revised version of the manuscript.*

Page 4 line 8 “..the equation provided by the manufactured was used for transforming permittivity data registered by the probes into soil water content” justify this statement, because FDR calibration strongly depends on soil type.

*Yes, you are right, soil type greatly influences the FDR probe readings. However, we used the equation provided by the manufacturer because we did not use these measurements for scheduling irrigation since we relied on stem water potential readings. Besides, the default equation can be used for relative or differential measurements since we are comparing the performance of two probes in the same soil but under two different irrigation regimes. We included a brief text explaining this and providing a citation from a work by Paraskovas et al. (2012) in International Agrophysics in order to justify our procedure.*

Page 7 line 15, add “and soil evaporation”

*Added as suggested.*

Page 7. Line17 “. . .Indeed, our results suggest that the water amount applied through irrigation was enough for fulfilling vineyard water requirements over the two growing seasons studied” justify this statement Table 1 Use ETc data, I don't know if the depth of irrigation dose is net or gross. The dose of irrigation calculated seems very low, because if we calculate the approximate dose irrigation as precipitation less than 50% of crop evapotranspiration assuming negligible value interception, surface storage and surface runoff, the value obtained would be much higher than the value shown in table

*We removed the sentence because we did not provide data on grapevine vegetative growth, yield and berry quality, which were slightly affected by irrigation and made us to conclude that. These data are pending for publication and have been submitted to another journal; therefore, we considered removing this sentence as the best option since it does not affect the main focus and conclusions from the current manuscript.*

*We agree with you in the sense that Table 1 led to confusion since the data reported there referred to the whole period of measurements and not exclusively to the irrigation period. Besides, this table provided similar information to that displayed in figure 2. Therefore, we removed the table from the main manuscript and moved it to supplementary materials and added the information referred to the irrigation period for each year.*

Fig 3 year 2011 around day 230 there is increase in rain-fed treatment in 20 cm depth but this increase is not showed in irrigated plot.

*This is true; it was caused by three rainfall events happening on consecutive days from the day 234 to the day 236, accumulating 15 mm. The 20 cm depth sensor in the rain-fed treatment responded quickly to this increase (increases in soil water content were observed in day 235), whereas the*

*sensor in the irrigated treatment responded more slowly (day 237). Moreover, when checking the data, we observed that this increase in the soil water content at 20 cm depth in the rain-fed treatment lift the values up to those observed in the irrigated treatment at the same depth. Therefore, it seemed to be just a delay in the response of the sensor since the water content at 20 cm depth in the irrigated treatment also increased (in a lower proportion than that in the rain-fed treatment) after two days of the last rainfall event.*

**Fig 5 and 7. Improve figure quality**

*Thank you, quality of the figures has been improved as you suggest. However, in order to reduce manuscript length, we moved figure 5 to the supplementary material.*

# Multifractal behaviour of the soil water content of a vineyard in NW Spain during two growing seasons

J. M. Mirás-Avalos<sup>1,2</sup>, E. Trigo-Córdoba<sup>1</sup>, R. da Silva-Dias<sup>3</sup>, I. Varela-Vila<sup>3</sup> and A. García-Tomillo<sup>3</sup>

[1]{Estación de Viticultura e Enoloxía de Galicia, EVEGA-INGACAL, Ponte San Clodio s/n, 32428, Leiro, Ourense, Spain}

[2]{Departamento de Riego, Centro de Edafología y Biología Aplicada del Segura, CEBAS-CSIC, Campus Universitario de Espinardo, 31000, Murcia, Spain}

[3]{Área de Edafología y Química Agrícola, Facultad de Ciencias, Universidade da Coruña. Campus A Zapateira s/n 15008 A Coruña, Spain}

Correspondence to: J. M. Mirás-Avalos (jose.manuel.miras.avalos@xunta.es)

## Abstract

Soil processes are characterized by a great degree of heterogeneity, which may be assessed by scaling properties. The aims of the current study were to describe the dynamics of soil water content at three depths in a vineyard under rain-fed and irrigation conditions and to assess the multifractality of these time data series. Frequency domain reflectometry (FDR) sensors were used for automatically monitoring soil water content in a vineyard located in Leiro (Ourense, NW Spain). Data were registered at 30-minute intervals at three depths (20, 40 and 60 cm) between 14<sup>th</sup> June and 26<sup>th</sup> August 2011 and 2012. Two treatments were considered: rain-fed and irrigation to 50% crop evapotranspiration. Soil water content data series obeyed power laws and tended to behave as multifractals. Values for entropy ( $D_1$ ) and correlation ( $D_2$ ) dimensions were lower in the series from the irrigation treatment. The Hölder exponent of order zero ( $\alpha_0$ ) was similar between treatments; however, the widths of the singularity spectra,  $f(\alpha)$ , were greater under irrigation conditions. Multifractality indices slightly decreased with depth. These results suggest that singularity and Rényi spectra were useful for characterizing the time variability of soil water content, distinguishing patterns among series registered under rain-fed and irrigation treatments.

1

## 2 **1 Introduction**

3 Soil water storage variability is strongly related with topographical, geological, edaphic and  
4 vegetation factors (Braud et al., 1995). These environmental factors and processes (rainfall,  
5 evapotranspiration, runoff) do not operate independently but as a conjunction of processes  
6 with nested and complex effects. Overall, this results in a distribution of soil water storage  
7 that varies as a function of the temporal and spatial scales. Therefore, similar to other soil  
8 properties and processes (Western and Blöschl, 1999; Zeleke and Si, 2006), soil water storage  
9 along time is a complex process characterized by a lack of homogeneity; heterogeneity in  
10 space and/or time is a feature that can be described by scaling procedures.

11 Fractals have been widely employed in soil science, as soil properties may be described  
12 through scale invariance concepts (Tyler and Wheatcraft, 1990; Perfect et al., 1996; Vidal  
13 Vázquez et al., 2007; Biswas et al., 2012a). More recently, several authors performed  
14 multifractal studies of heterogeneous time data series. For instance, Jiménez-Hornero et al.  
15 (2010) described ozone time series using the multifractal formalism. Rodríguez-Gómez et al.  
16 (2013) used a multifractal approach for characterizing solar radiation time series.

17 Soil water content can be automatically estimated by using sensors that measure variations in  
18 the soil dielectric constant, since it is strongly related with soil water content (Mestas-Valero  
19 et al., 2012). This parameter is characterized by its spiky dynamics, with sudden and intense  
20 peaks of high frequency activity, mostly at soil surface. Several studies have described scaling  
21 patterns for the behaviour of soil water content spatial distribution (e.g. Kim and Barros, 2002;  
22 Biswas et al., 2012b); however, multifractal analyses of continuously measured soil water  
23 content are scarce, except for a study on rain-fed grassland (Mestas-Valero et al., 2011).  
24 Therefore, the aim of the current work was to describe soil water dynamics in a vineyard  
25 subjected to two different treatments (rain-fed and irrigated) and to assess multifractality of  
26 these data series over two consecutive seasons.

27

## 1    **2    Materials and Methods**

### 2    **2.1    Description of the study area**

3    The experiment was conducted over two consecutive growing seasons (2011-2012) in a 0.2-  
4    ha vineyard (*Vitis vinifera* L.) planted with cultivar ‘Albariño’, located in the experimental  
5    farm of the Estación de Viticultura e Enoloxía de Galicia (EVEGA), in Leiro (42° 21.6’ N, 8°  
6    7.02’ W, elevation 115 m), Ourense, Spain (Fig. 1). Vines were grafted in 1998 on 196-17C  
7    rootstock and trained to a vertical trellis on a single cordon system (10-12 buds per vine).  
8    Rows were east-west oriented, spacings between vines and between rows were 1.25 and 2.4  
9    m, respectively (3333 vines ha<sup>-1</sup>). The soil at the site was sandy-textured (64% sand, 16% silt,  
10    20% clay), slightly acidic (pH 6.3), medium fertility (2.7% organic matter) and with a rather  
11    shallow profile (≈1.2 m). The climate of the studied site is temperate, humid with cool nights  
12    (Fraga et al., 2014).

### 13    **2.2    Experimental design**

14    The reference evapotranspiration (ET<sub>0</sub>) per week for the site was calculated from weather  
15    variables recorded at a station located 150 m away from the experimental vineyard using the  
16    Penman-Monteith equation (Allen et al., 1998). The ET<sub>0</sub> was then used, along with a constant  
17    crop coefficient (K<sub>c</sub> = 0.8) to compute the amount of water required by the vines (Trigo-  
18    Córdoba et al., 2015). Precipitation was subtracted from ET<sub>c</sub> each week. The calculated  
19    amount of water was applied the following week.

20    Treatments consisted of a rain-fed control and an irrigation to the 50% of ET<sub>c</sub>. Irrigation was  
21    applied from late June – [early July](#) (after bloom) till mid-August, approximately two weeks  
22    prior to harvest through two pressure-compensated emitters of 4 L h<sup>-1</sup> located 25 cm on either  
23    side of the vine. Irrigation water was of good quality, with pH of 6.35, electrical conductivity  
24    of 163.4 μS cm<sup>-1</sup> and 0.4 mg L<sup>-1</sup> of suspended solids. The water amount applied each season  
25    was 40 and 50 mm for 2011 and 2012, respectively ([Supplementary Table S.1](#)).

### 26    **2.3    Measurements**

27    The volumetric soil water content was continuously monitored through the soil profile in two  
28    spots of the experimental vineyard (one in the rain-fed treatment and another in the irrigated  
29    treatment) using two capacitance probes (EnviroSCAN, Sentek, Australia), based on the



1 frequency domain reflectometry (FDR) technique. Each probe was equipped with three  
2 sensors installed on an access tube at 20, 40 and 60 cm depth and connected to a datalogger.  
3 The probes were properly maintained for recording soil water content at half-hour intervals  
4 over the 2011 and 2012 seasons. Here, data from the irrigation period (mid-June to late-  
5 August) are reported.

6 In each treatment, the probe was located within two vines (Fig. 1), avoiding to be close to the  
7 emitters (25 cm from the emitter and 50 cm from the vine trunk, approximately). The  
8 equation provided by the manufacturer was used for transforming permitivity data registered  
9 by the probes into soil water content [since we only wanted to compare relative contents](#)  
10 [between these two irrigation regimes. Previous work suggest that soil type greatly affects the](#)  
11 [FDR readings, but the default equation is valid for differential measurements \(Paraskovas et](#)  
12 [al., 2012\).](#)

## 13 **2.4 Multifractal analysis**

14 The concepts of multifractals and their estimation methods that were used in the current study  
15 are next summarized. For detailed descriptions about multifractals, further information can be  
16 found in Chhabra et al. (1989) and Everstz and Mandelbrot (1992).

17 To implement the multifractal analysis of one-dimensional soil water content time  
18 distributions supported on a given interval  $I = [a, b]$ , a set of not-overlapping sub-intervals of  $I$   
19 with equal length is required. A common choice is to consider dyadic scaling down (Everstz  
20 and Mandelbrot, 1992; Caniego et al., 2005), which means successive partitions of  $I$  in  $k$   
21 stages ( $k = 1, 2, 3, \dots$ ). Hence, at each scale,  $d$ , a number of segments,  $N(\delta) = 2^k$  are obtained  
22 with characteristic time resolution,  $\delta = L \times 2^{-k}$ , covering the whole extent of  $I$ .

23 Multifractal approach applied to time series has already been described (Jiménez-Hornero et  
24 al., 2010), hence, we only summarize the technique used in the current study. The time  
25 interval of soil water content data series,  $L$ , varied from half an hour to two months and the  
26 minimum time resolution,  $\delta_{ini}$ , was chosen accounting for containing at least one half-hourly  
27 averaged soil moisture data,  $\theta_{ini}$ , at every initial interval. According to this, the probability  
28 mass distribution,  $p_i(\delta)$ , at time resolution  $\delta$  was estimated as:

$$29 \quad p_i(\delta) = \frac{\theta_i(\delta)}{\sum_j^{n_{ini}} (\theta_{ini})_j} \quad (1)$$

1 where  $\theta_i$  is the water content of the  $i^{th}$  interval and  $n_{ini}$  is the number of initial intervals with  
 2 mean soil water content  $\theta_{ini}$ .

3 The method of the moments was used (Chhabra et al., 1989) to analyze the multifractal  
 4 spectrum of the probability mass function,  $p_i(\delta)$ . The partition function  $\chi(q, \delta)$  was estimated:

$$5 \quad \chi(q, \delta) = \sum_{i=1}^n p_i(\delta)^q \quad (2)$$

6 where moment  $q$  is a real number between  $-\infty$  and  $+\infty$ .

7 A log-log plot of the partition function versus  $\delta$  for different values of  $q$  yields:

$$8 \quad \chi(q, \delta) \propto \delta^{-\tau(q)} \quad (3)$$

9 where  $\tau(q)$  is the mass scaling function of order  $q$ . The functions  $f(\alpha)$  and  $\alpha$  can be obtained by  
 10 Legendre transformation of the mass exponent,  $\tau(q)$ , as:  $f(\alpha) = \alpha(q) - \tau(q)$  and  $\alpha(q) = d\tau(q)/dq$ ,  
 11 respectively. Log-log plots of  $\chi_q(\delta)$ , versus  $\delta$ , however, typically exhibit linearity across a  
 12 limited scale range (e.g. Posadas et al., 2003), which results in drawbacks when using the  
 13 moment method to obtain the singularity spectrum.

14 The direct method (Chhabra and Jensen, 1989) avoids inaccuracies associated to the  
 15 estimation of  $\alpha(q)$  by Legendre transformation. This method is based on the calculation of the  
 16 contributions of individual segments,  $\mu_i(q, \delta)$ , to the partition function, which are defined as:

$$17 \quad \mu_i(q, \delta) = \mu_i^q(\delta) / \sum_{i=1}^{N(\delta)} \mu_i^q(\delta) \quad (4)$$

18 Then, using a set of real numbers,  $q$ , ( $-\infty < q < \infty$ ), the relationships applied to calculate  $f(\alpha)$   
 19 and  $\alpha$ , can be expressed as:

$$20 \quad f(\alpha(q)) \propto \frac{\sum_{i=1}^{N(\delta)} \mu_i(q, \delta) \log[\mu_i(q, \delta)]}{\log(\delta)} \quad (5a)$$

21 and

$$22 \quad \alpha(q) \propto \frac{\sum_{i=1}^{N(\delta)} \mu_i(q, \delta) \log[\mu_i(\delta)]}{\log(\delta)} \quad (5b)$$

23 The  $f(\alpha)$ - $\alpha$  spectrum is reduced to a point for monofractal scaling type. The minimum scaling  
 24 exponent ( $\alpha_{min}$ ) corresponds to the most concentrated region of the measure, and the  
 25 maximum exponent ( $\alpha_{max}$ ) corresponds to the rarefied regions of the measure. A plot of  $f(\alpha)$   
 26 vs.  $\alpha$  is called multifractal spectrum. It is a downward function with a maximum at  $q = 0$ . The

1 width of the multifractal spectrum ( $w = \alpha_{max} - \alpha_{min}$ ) indicates overall variability (Moreno et  
 2 al., 2008) similar to the nugget effects in geostatistics. For each data series, we calculated  
 3 multifractal spectrum with  $q$  from  $-10$  to  $+10$  in steps of  $0.5$ , fine enough to show the  
 4 multifractal behaviour in the studied moment range.

5 Multifractal measures can also be characterized on the basis of the generalized dimension,  $D_q$ ,  
 6 of the moment of order  $q$  of a distribution, defined by Grassberger and Procaccia (1983),  
 7 based on the work of Rényi (1955). The  $D_q$ , of a multifractal measure is calculated as:

$$8 \quad D_q = \frac{\tau(q)}{q-1} = \frac{1}{q-1} \lim_{\delta \rightarrow 0} \frac{\log[\chi_q(\delta)]}{\log \delta}, \quad q \neq 1 \quad (6a)$$

9 and

$$10 \quad D_1 \approx \lim_{\delta \rightarrow 0} \frac{\sum_{i=1}^{n(\delta)} \mu_i(\delta) \log[\mu_i(\delta)]}{\log \delta}, \quad q=1 \quad (6b)$$

11 Equation (6a) shows that  $\tau(q)$  is also related to the generalized fractal dimension,  $D_q$ . In fact,  
 12 the concept of generalized dimension,  $D_q$ , corresponds to the scaling exponent for the  $q^{\text{th}}$   
 13 moment of the measure. Using equation (6a),  $D_1$  becomes indeterminate. Therefore, for the  
 14 particular case that  $q=1$ , equation (6b) was employed.

15 For a monofractal,  $D_q$  is a constant function of  $q$ . However, for multifractal measures, the  
 16 relationship between  $D_q$  and  $q$  is described by a S-shaped curve. In this case, the most  
 17 frequently used generalized dimensions are  $D_0$  for  $q=0$ ,  $D_1$  for  $q=1$  and  $D_2$  for  $q=2$ , which  
 18 are referred to as capacity, information (or Shannon entropy) and correlation dimension,  
 19 respectively. The information dimension,  $D_1$ , provides insight about the degree of  
 20 heterogeneity in the distribution of the measure. The correlation dimension,  $D_2$ , is associated  
 21 to the uniformity of the measure among intervals and describes the average distribution  
 22 density of the measure. In general, the generalized dimension,  $D_q$ , is more useful for the  
 23 comprehensive study of multifractals. Differences between  $D_q$  allow comparison of the  
 24 complexity between measured soil water content data series. In homogeneous structures  $D_q$   
 25 are close, whereas in a monofractal they are equal.

26

## 1 **3 Results and discussion**

### 2 **3.1 Patterns of vineyard soil water content under rain-fed and irrigation** 3 **conditions**

4 Temperatures for the two studied growing seasons were similar in average (Table 1);  
5 however, rainfall and evapotranspiration were higher in 2012. Harvest date was almost the  
6 same in both years. Nevertheless, the temporal evolution of rainfall and  $ET_c$  differed from  
7 year to year (Fig. 2), being greater during 2012, especially at the beginning of the study  
8 period. This fact caused a different scheduling of irrigation between years.

9 Soil water content decreased over the growing season under rain-fed conditions in both years  
10 (Fig. 3). However, when irrigation was initiated, soil water content became more stable in the  
11 irrigated treatment (Fig. 3). The magnitude of the soil water loss was more evident in the  
12 layers of 20 and 40 cm depth, and less important in the 60 cm layer, which may indicate the  
13 depth of the active root zone as well as the intensity of root water uptake at each soil layer, as  
14 reported for other cultivars and crops (Intrigliolo and Castel, 2009; Mestas-Valero et al.,  
15 2011), and proved that FDR probes can be successfully used for irrigation scheduling  
16 (Goldhamer et al., 1999), calibrating them with established indicators such as midday stem  
17 water potential (Mirás-Avalos et al., 2014) and soil evaporation. ~~Indeed, our results suggest~~  
18 ~~that the water amount applied through irrigation was enough for fulfilling vineyard water~~  
19 ~~requirements over the two growing seasons studied.~~

### 20 **3.2 Multifractality of the soil water content time series**

21 Soil water content time series obeyed power law scaling, as shown by the double log plots  
22 ([Supplementary Fig. 4S.1](#)). These plots allow to identify the range of moments needed to  
23 describe the scale variation of the studied parameter (Vidal Vázquez et al., 2010).

24 Figure 4 shows the partition functions for rain-fed and irrigation conditions at 20 cm depth in  
25 2011. Visually, a slight departure from the straight line model was observed for moments  $q <$   
26  $-1$  ([Supplementary Fig. S.41](#)). In general, higher deviations from linearity were found for the  
27 highest  $q$  moments in the data series from the irrigation treatment, when compared to those  
28 from the rain-fed treatment, especially in 2012. Nevertheless, determination coefficients,  $R^2$ ,  
29 were greater than 0.9 for statistical moments in the range from  $q = -10$  to  $q = 10$ , in all the

1 studied data sets. Consequently, scalings are adequately defined. Similar results were found  
2 by Mestas-Valero et al. (2011) for soil water content under rain-fed grassland.

3 The  $\tau(q)$  functions were different from a monofractal type of scaling for all series analyzed,  
4 especially under irrigation conditions ([Supplementary Fig. 5S.2](#)), similar to results obtained  
5 by Biswas et al. (2012b) for soil water storage. In fact, the heterogeneity of the soil water  
6 content data series from the irrigated treatment was greater than that of the rain-fed treatment  
7 ([Supplementary Fig. 5S.2](#)).

8 The value of  $D_I$  is a good indicator of the heterogeneity degree in temporal distributions of a  
9 given variable. The closer the  $D_I$  value to  $D_0$ , the more homogeneous is the distribution of the  
10 variable. In our case, rain-fed series were more homogeneous than the irrigated ones. In  
11 general, soil water content recorded at 60 cm depth presented the lower differences between  
12  $D_I$  and  $D_0$  (Table 21), thus being more homogeneous both under rain-fed and irrigation  
13 conditions. Moreover, 2012 data series presented a higher heterogeneity than those from  
14 2011 (Table 21) for both treatments, caused by the greater rainfall amount collected in 2012.

15 A monofractal would be characterized by  $D_0 = D_I = D_2$  (Evertsz and Mandelbrot, 1992). In all  
16 the studied data series  $D_0 > D_I > D_2$  (Table 21), indicating that soil water content had a  
17 tendency to behave as a multifractal. However, differences ( $D_0 - D_I$ ) ranged from 0.051 to  
18 0.222 and ( $D_I - D_2$ ) oscillated between 0.053 and 0.168, which suggests different degree in  
19 the homogeneity/heterogeneity of soil water content depending on the treatment imposed and  
20 the depth in the soil profile. In general, data series from the irrigation treatment showed  
21 greater differences between  $D_0$ ,  $D_I$  and  $D_2$  than the series from the rain-fed treatment for both  
22 growing seasons. Moreover, the 60 cm depth layer presented smaller differences than the 20  
23 and 40 cm layers (Table 21). The width of the  $D_q$  spectra, determined by indicators such as  
24 ( $D_0 - D_{10}$ ), showed different degrees of heterogeneity, with a trend to decrease in depth and  
25 under rain-fed conditions when compared with the irrigation treatment (Table 21). This is  
26 caused by the spiky nature of soil water content and indicates a multiple scaling nature at  
27 shallow depths. Moreover, the width of the  $D_q$  spectra increased from 2011 to 2012 in both  
28 treatments, mainly in the 20 and 40 cm depths.

29 Generalized dimensions, or Rényi spectra, calculated for the range between  $q = -10$  and  $q =$   
30  $10$  for soil water content data series at three depths under rain-fed and irrigation conditions  
31 are displayed on Fig. 64. All the data series studied showed Rényi spectra as asymmetric  
32 sigma-shaped curves with more curvature for the negative values of  $q$  than for positive ones

1 | (Fig. 64). The left part of the curves is concave down and it changes to concave up on the  
2 | right of the vertical axis. In the case of the soil water content series from the rain-fed  
3 | treatment, the most curved spectra corresponded to the 40 cm depth data series, whereas for  
4 | the irrigation treatment, the most curved one was the 20 cm depth data series (Fig. 64). When  
5 | compared between treatments, Rényi spectra were more curved under irrigation conditions  
6 | and the estimation errors were also greater under this treatment (Fig. 64). These results  
7 | confirmed the higher heterogeneity (multifractality) of the data series from the irrigation  
8 | treatment when compared to those from rain-fed.

9 | Mestas-Valero et al. (2011) obtained monofractal distributions of soil water content time  
10 | series under grassland when measured at depths greater than 40 cm, in contrast with our  
11 | results. This disagreement is likely caused by the fact that grapevine root system reach greater  
12 | depths than that of grass and vines are capable of uptaking water from deeper soil layers.

13 | Determination coefficients,  $R^2$ , were highest for moments  $q = 0$  and  $q = 1$  and diminished for  
14 | the other  $|q|$  moments. In the case of  $q = 10$ ,  $R^2$  was greater than 0.97 and 0.95 in the rain-fed  
15 | and irrigated data sets, respectively. For  $q = -10$ ,  $R^2$  values for rain-fed and irrigated data  
16 | series were greater than 0.99 and 0.91, respectively (data not shown). Standard errors of  $D_q$   
17 | values increased with increasing  $|q|$  moments and they were much lower for right ( $q > 0$ ) than  
18 | for left ( $q < 0$ ) branch of the Rényi spectra (Fig. 64).

19 | Parameter  $\alpha_0$  from the singularity spectra ranged from 1.056 to 1.146 in the rain-fed treatment  
20 | and from 1.075 to 1.187 in the irrigated treatment (Table 32). The singularity spectrum allows  
21 | for analyzing similarity or difference between the scaling properties of the measures as well  
22 | as to assess the local scaling properties of soil water content measurements. The wider the  
23 | spectrum is (i.e., the largest  $\alpha_{q^-} - \alpha_{q^+}$  value), the higher the heterogeneity in the scaling  
24 | indices and vice versa (Vidal Vázquez et al., 2010). Moreover, the  $f(\alpha)$  spectrum branch  
25 | length gives insight about the abundance of the measure. Hence, small  $f(\alpha)$  values at the end  
26 | of a long branch correspond to rare events. Our results showed that the width of the  
27 | singularity spectra increased in both treatments from 2011 to 2012 (Table 2).

28 | Singularity spectra are characterized by a concave down shape (Fig. 75), showing an  
29 | asymmetrical curve with wider but shorter right side. Rain-fed data series showed a shorter  
30 |  $f(\alpha)$  spectrum in both years, confirming their low degree of multifractality when compared to  
31 | the irrigated data series (Fig. 75).

1 Differences ( $\alpha_{q-} - \alpha_0$  and  $\alpha_0 - \alpha_{q+}$ ) indicate the deviation of the spectrum from its maximum  
2 value ( $q = 0$ ) towards the right side ( $q < 0$ ) and the left side ( $q > 0$ ), respectively (Vidal  
3 Vázquez et al., 2010). Usually, soil water content data series from the rain-fed treatment  
4 showed lower  $\alpha_0 - \alpha_{q+}$  values than those from the irrigated treatment (Table 32). Moreover,  
5 the highest values for this multifractal parameter were observed at 40 cm depth in both  
6 treatments and years (Table 32). This may indicate that higher soil water contents were more  
7 frequent under irrigation, being greater the differences between treatments at 40 cm depth in  
8 2012. In contrast, the right branch ( $\alpha_{q-} - \alpha_0$ ) of the spectrum was usually wider for rain-fed  
9 conditions (Table 32). These results confirm the differential homogeneity/heterogeneity  
10 pattern between treatments evidenced by the generalized dimension,  $D_q$ , analysis (Table 21,  
11 Fig. 64).

12

#### 13 **4 Conclusions**

14 Under the conditions of this study, continuous soil water content measurements at different  
15 depths reliably described the soil water balance in a vineyard over two irrigation periods.

16 The logarithms of the partition function varied linearly with the logarithms of the time  
17 resolution for all the studied depths under both treatments considered in the range of moments  
18  $-10 < q < 10$ , indicating that soil water content time series obeyed power laws.

19 The scaling properties of soil water content time series were reasonably fitted to multifractal  
20 models. These properties were different for the rain-fed and irrigation treatments, implying a  
21 higher heterogeneity for the data series from the irrigation treatment, which tended to increase  
22 in the second year of the study (2012). Therefore, multifractal analysis allowed us to  
23 discriminate among soil water content patterns in a vineyard for the 2011 and 2012 growing  
24 seasons as a function of irrigation use.

25

#### 26 **Author contribution**

27 J. M. Mirás-Avalos and E. Trigo-Córdoba designed and carried out the field experiment. J. M.  
28 Mirás-Avalos, R. da Silva-Dias, I. Varela-Vila and A. García-Tomillo performed the  
29 analyses. J. M. Mirás-Avalos prepared the manuscript with contributions from all co-authors.

30

## 1 **Acknowledgements**

2 This work has been partially supported by INIA (RTA2011-00041-C02-01), with 80% FEDER  
3 funds. J.M. Mirás-Avalos thanks Xunta de Galicia for his ‘Isidro Parga Pondal’ contract. E.  
4 Trigo-Córdoba thanks INIA for his FPI scholarship. The authors thank Dr. A Paz González  
5 for support and discussion about multifractal analysis.

6



## 1 **References**

- 2 Allen, R. G., Pereira, L. S., Raes, D., and Smith, M.: Crop evapotranspiration. Guidelines for  
3 computing crop water requirements, FAO Irrigation and Drainage paper No 56, Rome, Italy,  
4 1998.
- 5 Biswas, A., Cresswell, H. P., and Si, B. C.: Application of multifractal and joint multifractal  
6 analysis in examining soil spatial variation: A review, Fractal Analysis and Chaos in  
7 Geosciences, Dr. Sid-Ali Ouadfeul (Ed.), ISBN: 978-953-51-0729-3, InTech. 2012a.
- 8 Biswas, A., Zeleke, T. B., and Si, B. C.: Multifractal detrended fluctuation analysis in  
9 examining scaling properties of the spatial patterns of soil water storage, Nonlin. Processes  
10 Geophys., 19, 227-238, 2012b.
- 11 Braud, I., Dantasantonino, A. C., and Vauclin, M.: Approach to studying the influence of the  
12 spatial variability of soil hydraulic properties on surface fluxes, temperature and humidity, J.  
13 Hydrol., 165, 283-310, 1995.
- 14 Caniego, F. J., Espejo, R., Martín, M. A., and San José, F.: Multifractal scaling of soil spatial  
15 variability, Ecol. Model., 182, 291-303, 2005.
- 16 Chhabra, A. B. and Jensen, R. V.: Direct determination of the  $f(\alpha)$  singularity spectrum, Phys.  
17 Rev. Lett., 62, 1327-1330, 1989.
- 18 Chhabra, A. B., Meneveau, C., Jensen, R. V., and Sreenivassen, K. R.: Direct determination  
19 of the  $f(\alpha)$  singularity spectrum and its application to fully developed turbulence, Phys. Rev.  
20 A, 40, 5284-5294, 1989.
- 21 Everstz, C. J. G. and Mandelbrot, B. B.: Multifractal measures, in Chaos and Fractals,  
22 Springer, Berlin, 1992.
- 23 Fraga, H., Malheiro, A. C., Moutinho-Pereira, J., Cardoso, R. M., Soares, P. M. M., Cancela,  
24 J. J., Pinto, J. G., and Santos, J. A.: Integrated analysis of climate, soil, topography and  
25 vegetative growth in Iberian viticultural regions, PLOS One, 9(9), e108078, 2014.
- 26 Goldhamer, D. A., Fereres, E., Mata, M., Girona, J., and Cohen, M.: Sensitivity of continuous  
27 and discrete plant and soil water status monitoring in peach trees subjected to deficit  
28 irrigation, J. Amer. Soc. Hortic. Sci., 124, 437-444, 1999.

- 1 Grassberger, P. and Procaccia, I.: Characterization of strange attractors, Phys. Rev. Lett., 50,  
2 346-349, 1983.
- 3 ~~Halsey, T. C., Jensen, M. H., Kanadoff, L. P., Procaccia, I., and Shraiman, B.I.: Fractal~~  
4 ~~measures and their singularities: The characterization of strange sets, Phys. Rev. A, 33, 1141-~~  
5 ~~1151, 1986.~~
- 6 Intrigliolo, D. S. and Castel, J. R.: Response of Vitis vinifera cv. ‘Tempranillo’ to partial  
7 rootzone drying in the field: Water relations, growth, yield and fruit and wine quality, Agric.  
8 Water Manage., 96, 282-292, 2009.
- 9 Jiménez-Hornero, F. J., Gutiérrez de Ravé, E., Ariza-Villaverde, A. B., and Giráldez, J. V.:  
10 Description of the seasonal pattern in ozone concentration time series by using the strange  
11 attractor multifractal formalism, Environ. Monitor. Assess., 160, 229-236, 2010.
- 12 Kim, G. and Barros, A.P.: Space-time characterization of soil moisture from pasive  
13 microwave remotely sensed imagery and ancillary data, Remote Sens. Environ., 81, 393-403,  
14 2002.
- 15 ~~Korvin, G.: Fractal models in the Earth Sciences, Elsevier, Amsterdam, 1992.~~
- 16 Mestas-Valero, R. M., Valcárcel Armesto, M., Mirás-Avalos, J. M., Vidal Vázquez, E., Paz  
17 Ferreira, J., and Guimarães Giácomo, R.: Temporal trends of water content under grassland:  
18 characterization using the multifractal approach, Estudios de la Zona No Saturada del Suelo  
19 vol. X, Universidad de Salamanca, 109-112, 2011.
- 20 Mestas-Valero, R. M., Mirás-Avalos, J. M., and Vidal Vázquez, E.: Estimation of the daily  
21 water consumption by maize under Atlantic climatic conditions (A Coruña, NW Spain) using  
22 Frequency Domain Reflectometry, Nat. Hazards Earth Syst. Sci., 12, 709-714, 2012.
- 23 Mirás-Avalos, J. M., Trigo-Córdoba, E., and Bouzas-Cid, Y.: Does predawn water potential  
24 discern between irrigation treatments in Galician white grapevine cultivars?, J. Int. Sci. Vigne  
25 Vin, 48(2), 123-127, [2014](#).
- 26 Moreno, R., Díaz Álvarez, M. C., Tarquis Alfonso, A. M., Barrington, S., and Saa Requejo,  
27 A.: Tillage and soil type effects on soil surface roughness at semiarid climatic conditions, Soil  
28 Till. Res., 98, 35-44, 2008.
- 29 [Paraskovas, C., Georgiou, P., Ilias, A., Panoras, A., and Babajimopoulos, C.: Calibration](#)  
30 [equations for two capacitance water content probes, Int. Agrophys., 26, 285-293, 2012.](#)

- 1 Perfect, E., McLaughlin, N. B., Kay, B. D., and Topp, G. C.: An improved fractal equation for  
2 the soil water retention curve, *Water Resour. Res.*, 32, 281-287, 1996.
- 3 ~~Posadas, A., Jiménez, D., and Quiroz, R.: Análisis multifractal de la variabilidad espacial de~~  
4 ~~la conductividad hidráulica en un suelo estratificado, *Rev. Inv. Física*, 5, 36-43, 2002.~~
- 5 Posadas, A. N. D., Gimenez, D., Quiroz, R., and Protz, R. Multifractal characterization of soil  
6 pore systems, *Soil Sci. Soc. Am. J.*, 67, 1361–1369, 2003.
- 7 Rényi, A.: On new axiomatic theory of probability, *Acta Math. Hung.*, 6, 285-335, 1955.
- 8 Rodríguez-Gómez, B. A., Meizoso-López, M. C., Mirás-Avalos, J. M., García-Tomillo, A.,  
9 and Paz-González, A.: Assessment of solar irradiation models in A Coruña by multifractal  
10 analysis, *Vadose Zone J.*, 12(3), doi:10.2136/vzj2012.0183, 2013.
- 11 Trigo-Córdoba, E., Bouzas-Cid, Y., Orriols-Fernández, I., and Mirás-Avalos, J. M.: Effects of  
12 deficit irrigation on the performance of grapevine (*Vitis vinifera* L.) cv. ‘Godello’ and  
13 ‘Treixadura’ in Ribeiro, NW Spain. *Agric. Water Manage.*, 161, 20-30, 2015.
- 14 Tyler, W. T. and Wheatcraft, S.: Fractal processes in soil water retention, *Water Resour. Res.*,  
15 26, 1047-1054, 1990.
- 16 Vidal Vázquez, E., Miranda, J. G. V., and Paz González, A.: Describing soil surface  
17 microrelief by crossover length and fractal dimension, *Nonlin. Processes Geophys.*, 14, 223-  
18 235, 2007.
- 19 Vidal Vázquez, E., Miranda, J. G. V., and Paz Ferreiro, J.: A multifractal approach to  
20 characteriza cumulative rainfall and tillage effects on soil surface micro-topography and to  
21 predict depression storage, *Biogeosci.*, 7, 2989-3004, 2010.
- 22 Western, A. W. and Blöschl, G.: On spatial scaling of soil moisture, *J. Hydrol.*, 217, 203-224,  
23 1999.
- 24 Zeleke, T. B. and Si, B. C.: Characterizing scale-dependent spatial relationships between soil  
25 properties using multifractal techniques, *Geoderma*, 134, 440-452, 2006.

26  
27

1 ~~Table 1. Summary of climate variables (temperature, rainfall and ET<sub>0</sub>), irrigation water~~  
2 ~~applied and harvest date for the studied period in 2011 and 2012 (from 14<sup>th</sup> June to 26~~  
3 ~~August).~~

| Year | Temperature (°C) |         |         | Rainfall<br>(mm) | ET <sub>0</sub><br>(mm) | Irrigation<br>(mm) | Harvest date               |
|------|------------------|---------|---------|------------------|-------------------------|--------------------|----------------------------|
|      | Minimum          | Maximum | Average |                  |                         |                    |                            |
| 2011 | 12.44            | 28.86   | 20.15   | 25.60            | 230.78                  | 39.67              | 14 <sup>th</sup> September |
| 2012 | 12.33            | 28.21   | 19.67   | 65.60            | 344.91                  | 50.00              | 13 <sup>th</sup> September |

4

5

1 | Table 21. Selected multifractal parameters: generalized dimensions, for the first-three positive  
 2 | moments,  $D_0$ ,  $D_1$ , and  $D_2$ , with their respective errors of estimation, and two multifractality  
 3 | indices  $\Delta(D_0 - D_2)$  and  $\Delta(D_0 - D_{10})$ .

| Treatment | Depth<br>(cm) | $D_0$             | $D_1$             | $D_2$             | $\Delta(D_0 - D_2)$ | $\Delta(D_0 - D_{10})$ |
|-----------|---------------|-------------------|-------------------|-------------------|---------------------|------------------------|
| 2011      |               |                   |                   |                   |                     |                        |
| Rain-fed  | 20            | $0.999 \pm 0.001$ | $0.937 \pm 0.008$ | $0.884 \pm 0.016$ | 0.115               | 0.672                  |
|           | 40            | $1.000 \pm 0.000$ | $0.881 \pm 0.007$ | $0.746 \pm 0.014$ | 0.254               | 0.752                  |
|           | 60            | $1.000 \pm 0.000$ | $0.925 \pm 0.007$ | $0.868 \pm 0.013$ | 0.133               | 0.656                  |
|           | 20-60         | $1.000 \pm 0.000$ | $0.916 \pm 0.008$ | $0.833 \pm 0.019$ | 0.167               | 0.589                  |
| Irrigated | 20            | $0.999 \pm 0.001$ | $0.868 \pm 0.013$ | $0.778 \pm 0.026$ | 0.221               | 0.757                  |
|           | 40            | $1.000 \pm 0.000$ | $0.852 \pm 0.019$ | $0.773 \pm 0.026$ | 0.227               | 0.698                  |
|           | 60            | $1.000 \pm 0.000$ | $0.852 \pm 0.022$ | $0.758 \pm 0.034$ | 0.242               | 0.664                  |
|           | 20-60         | $1.000 \pm 0.000$ | $0.861 \pm 0.023$ | $0.773 \pm 0.037$ | 0.227               | 0.695                  |
| 2012      |               |                   |                   |                   |                     |                        |
| Rain-fed  | 20            | $0.999 \pm 0.001$ | $0.861 \pm 0.014$ | $0.771 \pm 0.025$ | 0.228               | 0.856                  |
|           | 40            | $1.000 \pm 0.000$ | $0.888 \pm 0.008$ | $0.739 \pm 0.017$ | 0.261               | 0.801                  |
|           | 60            | $1.000 \pm 0.000$ | $0.949 \pm 0.004$ | $0.907 \pm 0.005$ | 0.093               | 0.548                  |
|           | 20-60         | $1.000 \pm 0.000$ | $0.898 \pm 0.006$ | $0.768 \pm 0.016$ | 0.232               | 0.682                  |
| Irrigated | 20            | $0.984 \pm 0.006$ | $0.831 \pm 0.010$ | $0.731 \pm 0.019$ | 0.253               | 1.024                  |
|           | 40            | $0.979 \pm 0.006$ | $0.757 \pm 0.014$ | $0.589 \pm 0.022$ | 0.390               | 1.210                  |
|           | 60            | $1.000 \pm 0.000$ | $0.907 \pm 0.007$ | $0.805 \pm 0.015$ | 0.195               | 0.622                  |
|           | 20-60         | $0.993 \pm 0.003$ | $0.822 \pm 0.016$ | $0.707 \pm 0.030$ | 0.286               | 1.085                  |

4

5

1 | Table 32. Selected multifractal parameters derived from the  $f(\alpha)$  singularity spectra: most  
 2 | positive ( $q_+$ ) and most negative ( $q_-$ ) limits the range of multifractal scaling, Hölder exponent  
 3 | of order 0 ( $\alpha_0$ ), most positive ( $\alpha_{q_+}$ ) and most negative ( $\alpha_{q_-}$ ) exponents, widths of the left ( $\alpha_0 -$   
 4 |  $\alpha_{q_+}$ ) and the right ( $\alpha_{q_-} - \alpha_0$ ) sides of the spectra.

| Treatment | Depth (cm) | $q_-$ | $q_+$ | $\alpha_0$ | $\alpha_{q_+}$ | $\alpha_{q_-}$ | $\alpha_0 - \alpha_{q_+}$ | $\alpha_{q_-} - \alpha_0$ |
|-----------|------------|-------|-------|------------|----------------|----------------|---------------------------|---------------------------|
| 2011      |            |       |       |            |                |                |                           |                           |
| Rain-fed  | 20         | -1.5  | 3.5   | 1.066      | 0.768          | 1.339          | 0.299                     | 0.273                     |
|           | 40         | -3.5  | 2     | 1.093      | 0.632          | 1.328          | 0.460                     | 0.235                     |
|           | 60         | -3.5  | 2     | 1.087      | 0.718          | 1.403          | 0.369                     | 0.315                     |
|           | 20-60      | -4    | 2     | 1.074      | 0.762          | 1.297          | 0.312                     | 0.222                     |
| Irrigated | 20         | -2.5  | 2     | 1.136      | 0.714          | 1.450          | 0.422                     | 0.314                     |
|           | 40         | -4    | 3     | 1.160      | 0.664          | 1.383          | 0.496                     | 0.222                     |
|           | 60         | -5    | 2     | 1.132      | 0.700          | 1.333          | 0.435                     | 0.200                     |
|           | 20-60      | -4.5  | 2     | 1.142      | 0.709          | 1.375          | 0.433                     | 0.233                     |
| 2012      |            |       |       |            |                |                |                           |                           |
| Rain-fed  | 20         | -2.5  | 3     | 1.146      | 0.659          | 1.526          | 0.487                     | 0.380                     |
|           | 40         | -3.5  | 2     | 1.082      | 0.603          | 1.301          | 0.479                     | 0.219                     |
|           | 60         | -2    | 5.5   | 1.056      | 0.746          | 1.296          | 0.309                     | 0.240                     |
|           | 20-60      | -5    | 2     | 1.077      | 0.651          | 1.265          | 0.426                     | 0.188                     |
| Irrigated | 20         | -0.5  | 2.5   | 1.164      | 0.602          | 1.361          | 0.562                     | 0.197                     |
|           | 40         | -1    | 1.5   | 1.187      | 0.575          | 1.491          | 0.611                     | 0.304                     |
|           | 60         | -4    | 2     | 1.075      | 0.716          | 1.223          | 0.360                     | 0.148                     |
|           | 20-60      | -1    | 2     | 1.172      | 0.624          | 1.489          | 0.548                     | 0.317                     |

5

6

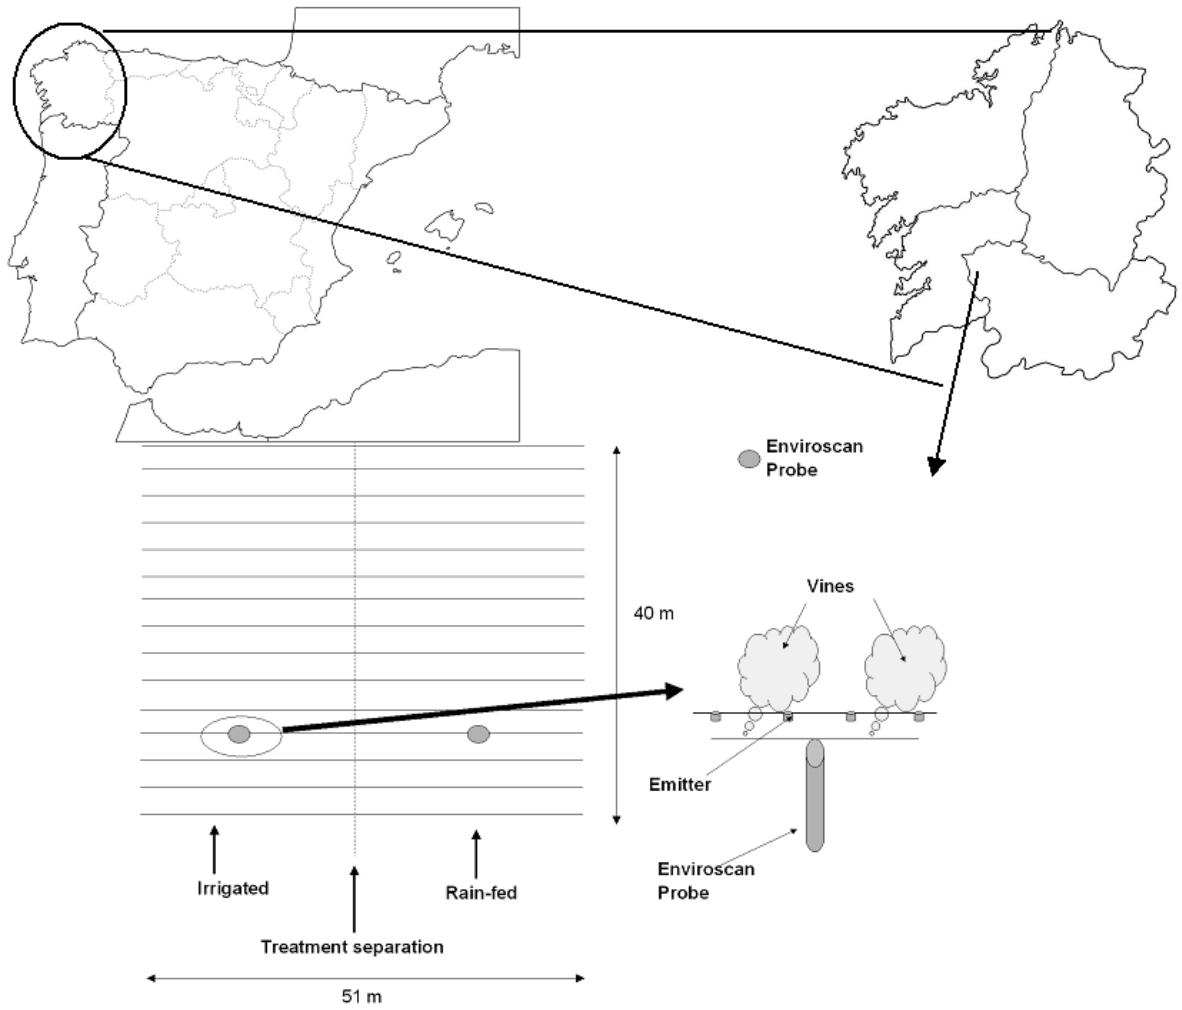

1  
2  
3  
4

Figure 1. Location of the studied vineyard and experimental layout.

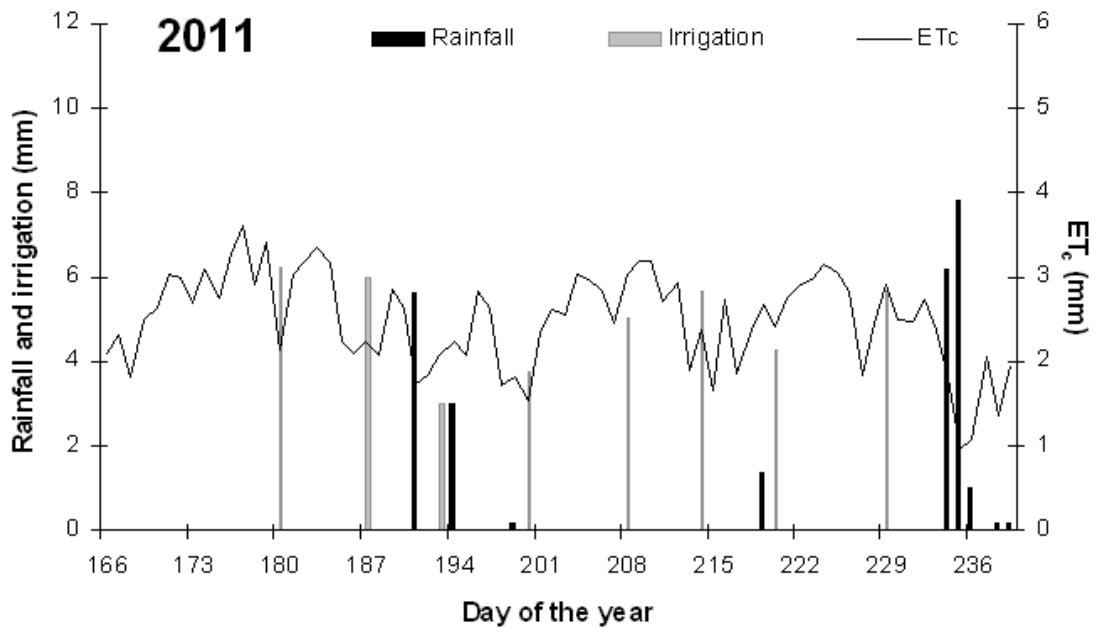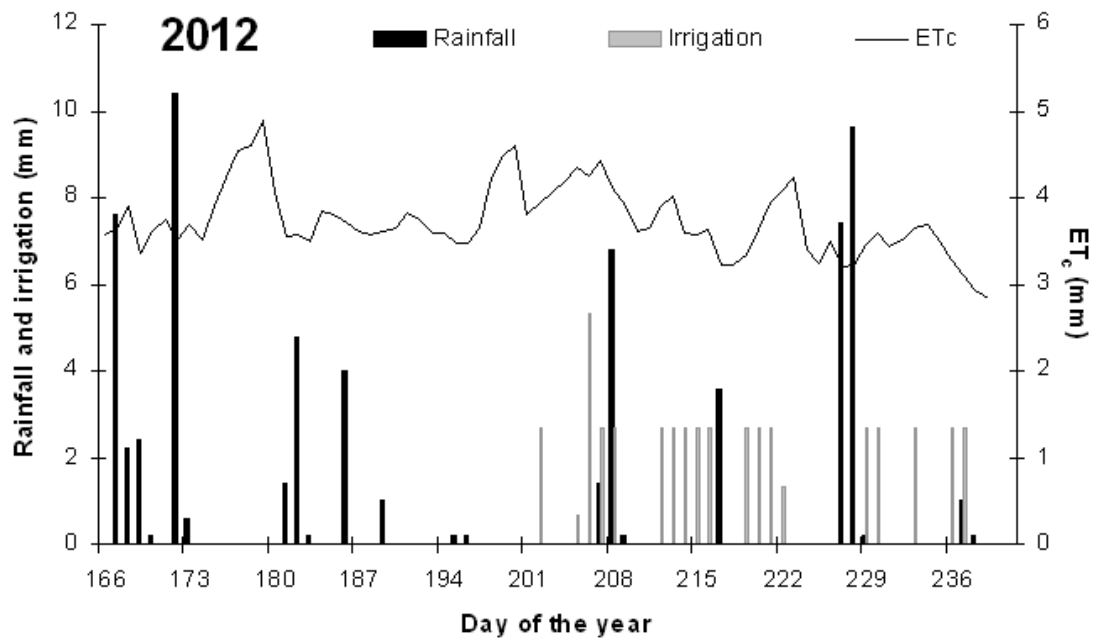

1  
2  
3  
4  
5

Figure 2. Crop evapotranspiration (ET<sub>c</sub>), rainfall and irrigation water applied over the two growing seasons studied, 2011 and 2012. Day of the year 166 is 14<sup>th</sup> June.



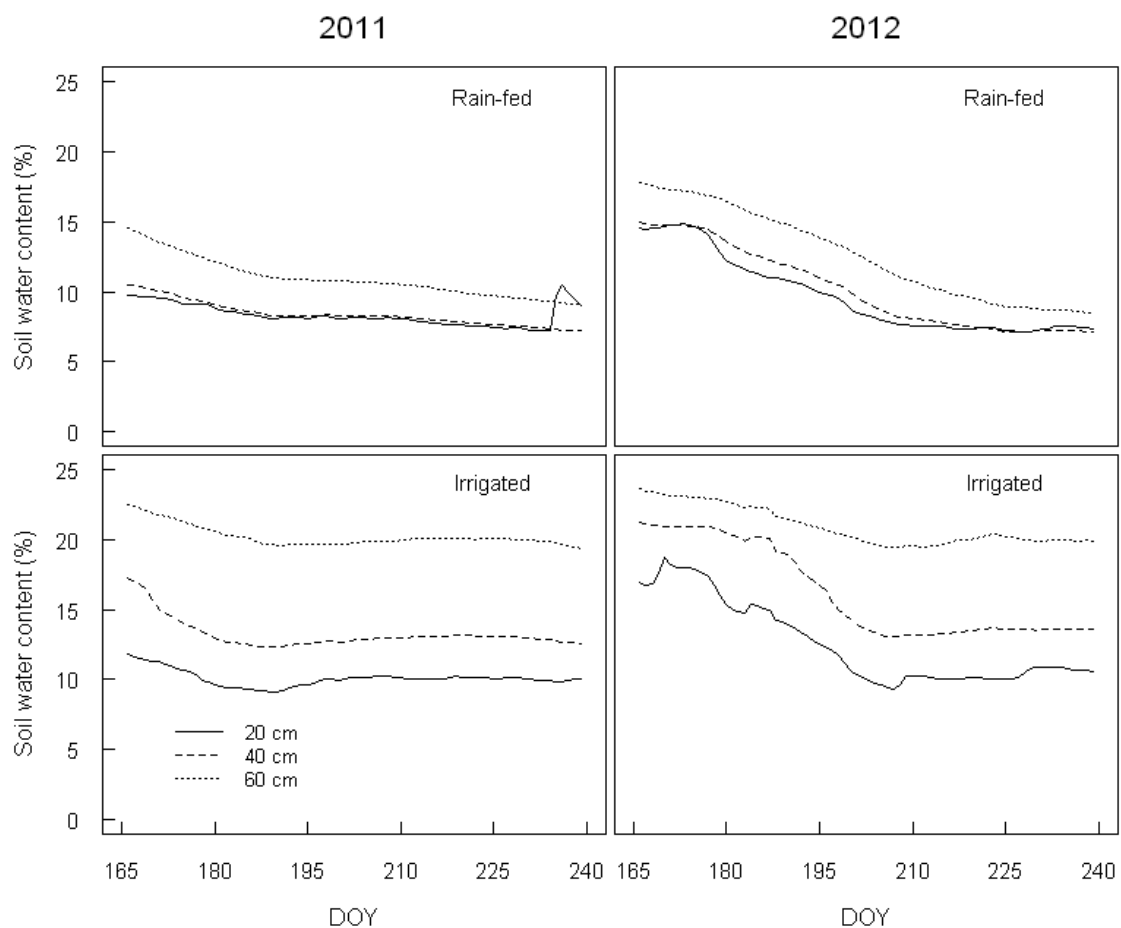

1  
 2 Figure 3. Soil water content at three depths (20, 40 and 60 cm) for rain-fed and irrigation  
 3 treatments over the 2011 and 2012 growing seasons. DOY stands for Day of the Year (165 =  
 4 13<sup>th</sup> June).

5  
 6

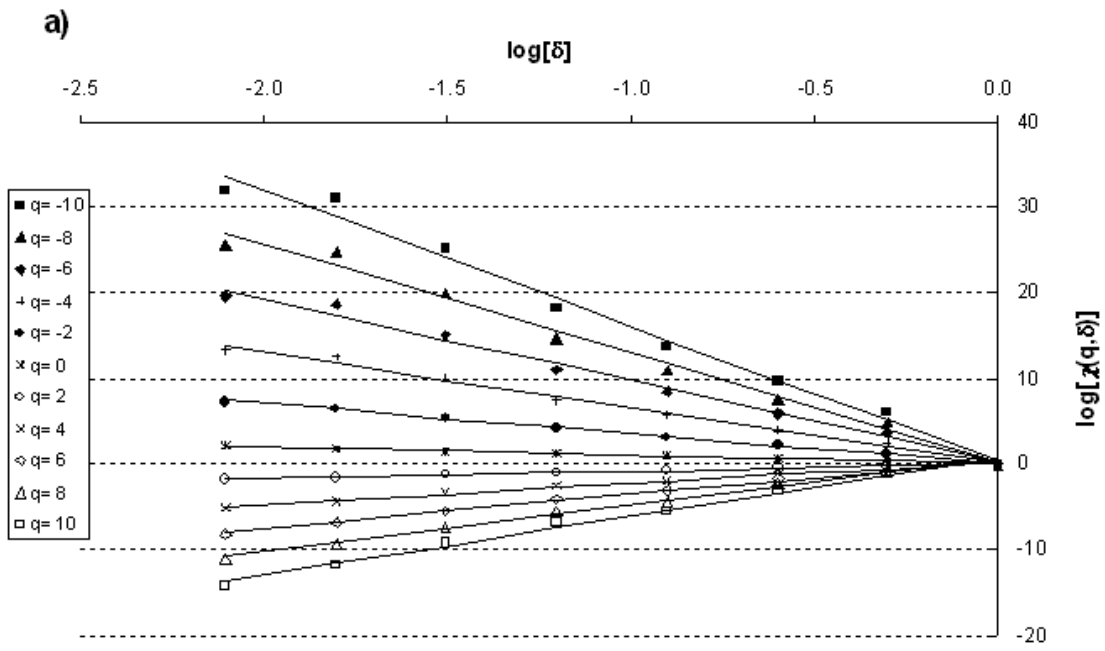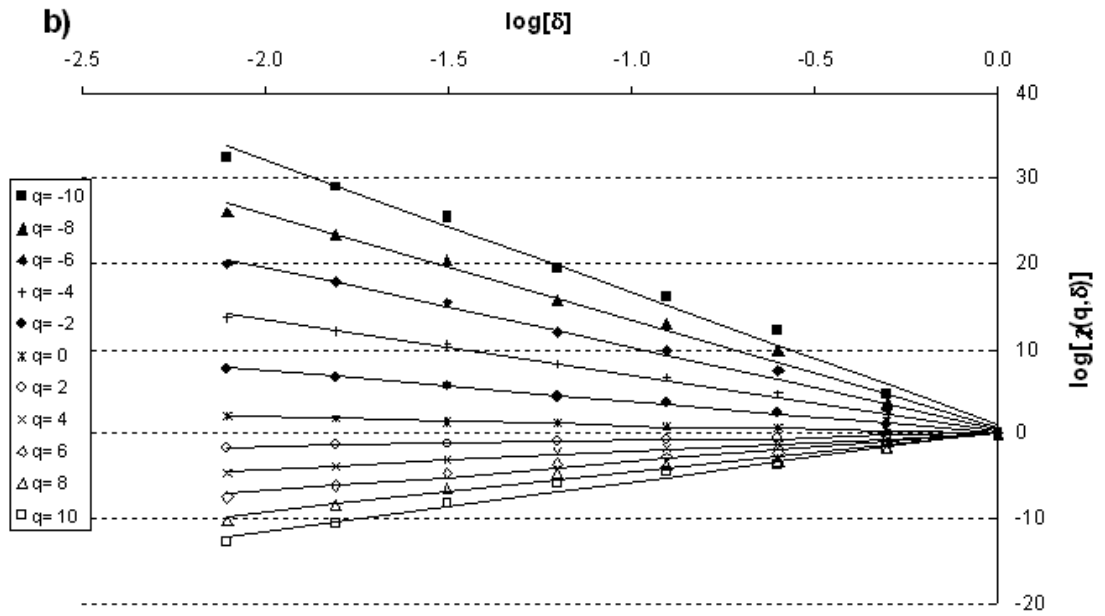

1  
2  
3  
4  
5  
6  
7

Figure 4. Selected plots of the natural logarithms of the partition function,  $\chi(q, \delta)$ , versus the time resolution,  $\delta$ : a) rain fed treatment at 20 cm depth in 2011; b) irrigated treatment at 20 cm depth in 2011.

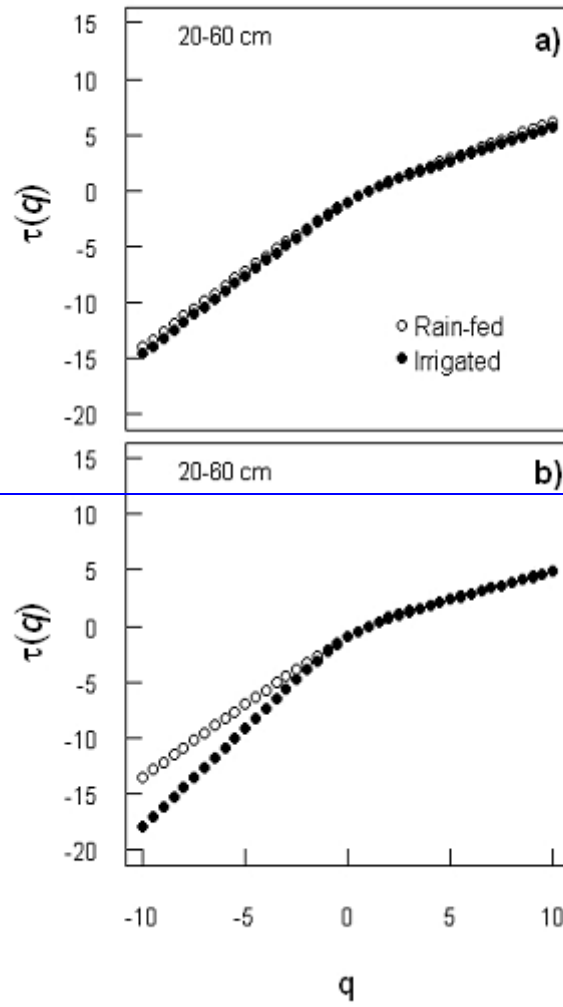

1  
2  
3  
4  
5

Figure 5. Mass exponents,  $\tau(q)$ , of soil water content averaged from 20 to 60 cm depth for rain-fed and irrigation treatments: a) 2011, b) 2012.

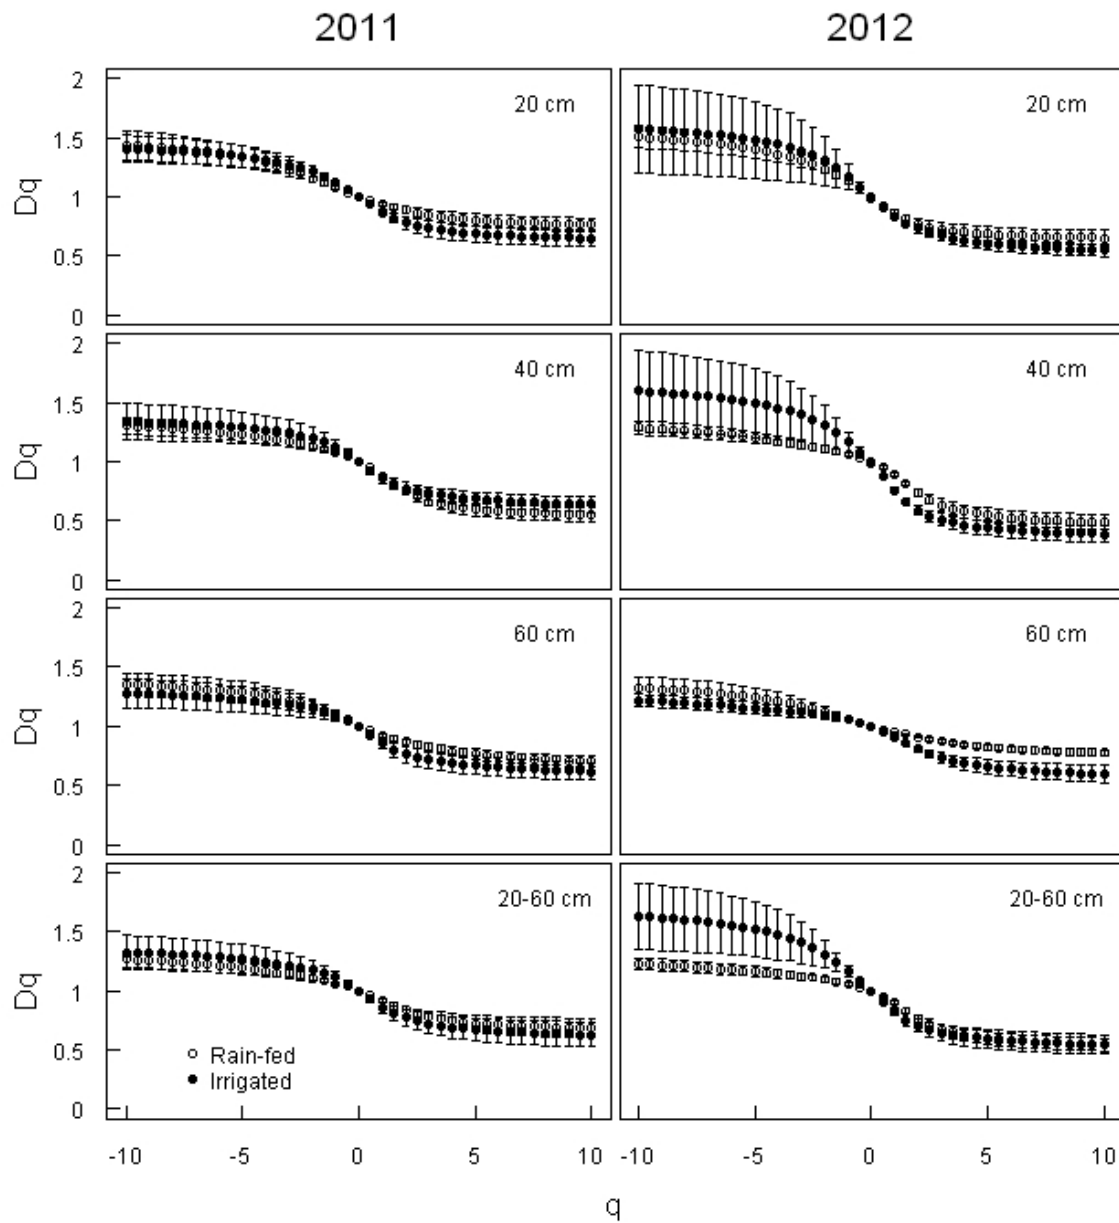

1  
2  
3  
4  
5  
6  
7

Figure 64. Generalized dimension,  $D_q$ , spectra ( $-10 < q < 10$ ) of soil water content for rain-fed and irrigation treatments at the studied depths in 2011 and 2012. Bars indicate estimation errors.

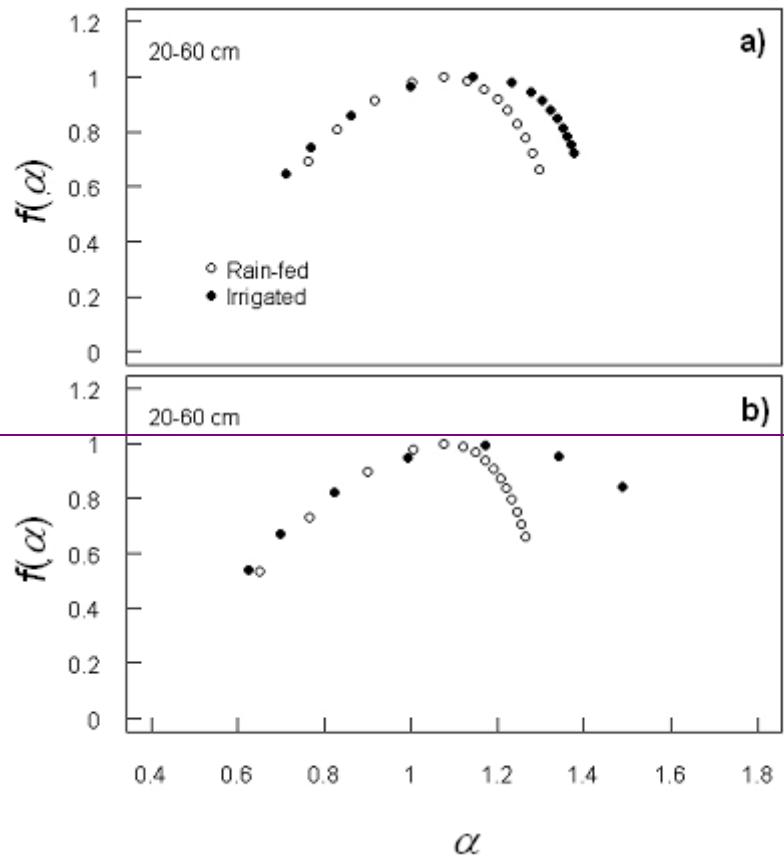

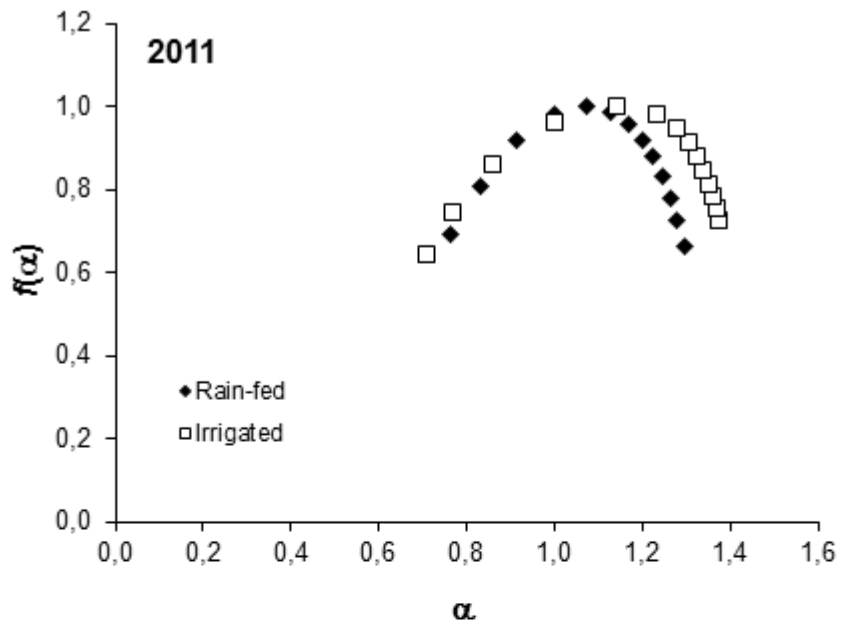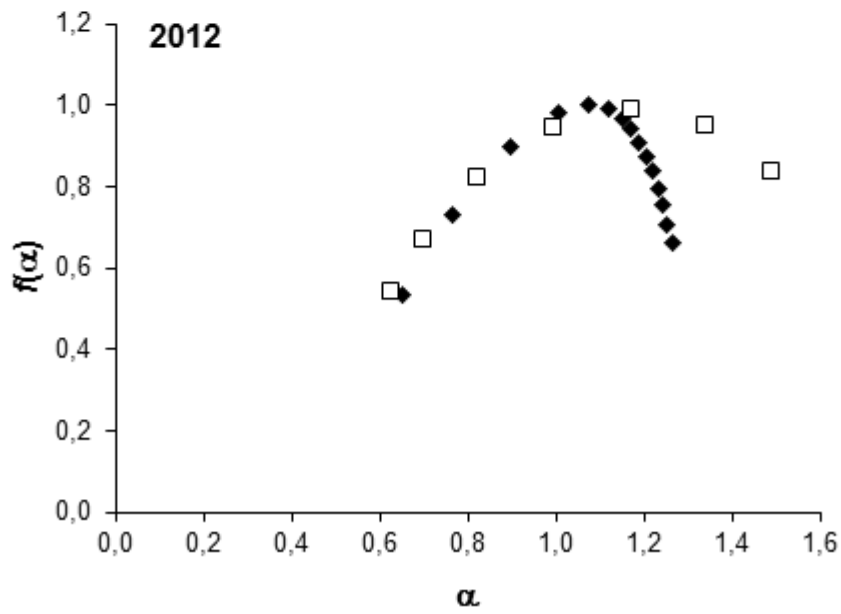

1  
 2 Figure 75. Singularity spectra for soil water content averaged from 20 to 60 cm depth for rain-  
 3 fed and irrigation treatments in 2011 and 2012: a) 2011, b) 2012.

**Multifractal behaviour of the soil water content of a vineyard in NW Spain during two growing seasons. Mirás-Avalos et al. (Supplementary Materials)**

**Supplementary information**

**Table S1.** Summary of climate variables (temperature, rainfall,  $ET_0$  and  $ET_c$ ), irrigation water applied and harvest date for the studied and irrigation periods in 2011 and 2012.

|                    |         | 2011                       | 2012                       |
|--------------------|---------|----------------------------|----------------------------|
| Measurement period |         | 14 June to 26 August       | 14 June to 26 August       |
| Temperature (°C)   | Maximum | 28.86                      | 28.21                      |
|                    | Minimum | 12.44                      | 12.33                      |
|                    | Mean    | 20.15                      | 19.67                      |
| Rainfall (mm)      |         | 25.60                      | 65.60                      |
| $ET_0$             |         | 230.78                     | 344.91                     |
| $ET_c$             |         | 184.63                     | 275.93                     |
| Irrigation period  |         | 9 July to 16 August        | 20 July to 22 August       |
| Temperature (°C)   | Maximum | 29.14                      | 30.37                      |
|                    | Minimum | 12.61                      | 12.77                      |
|                    | Mean    | 20.36                      | 20.82                      |
| Rainfall (mm)      |         | 10.20                      | 29.20                      |
| $ET_0$             |         | 117.86                     | 162.52                     |
| $ET_c$             |         | 94.28                      | 130.02                     |
| Irrigation (mm)    |         | 39.67                      | 50.00                      |
| Harvest date       |         | 14 <sup>th</sup> September | 13 <sup>th</sup> September |

**Figure S1.** Selected plots of the natural logarithms of the partition function,  $\chi(q, \delta)$ , versus the time resolution,  $\delta$ : a) rain-fed treatment at 20 cm depth in 2011; b) irrigated treatment at 20 cm depth in 2011.

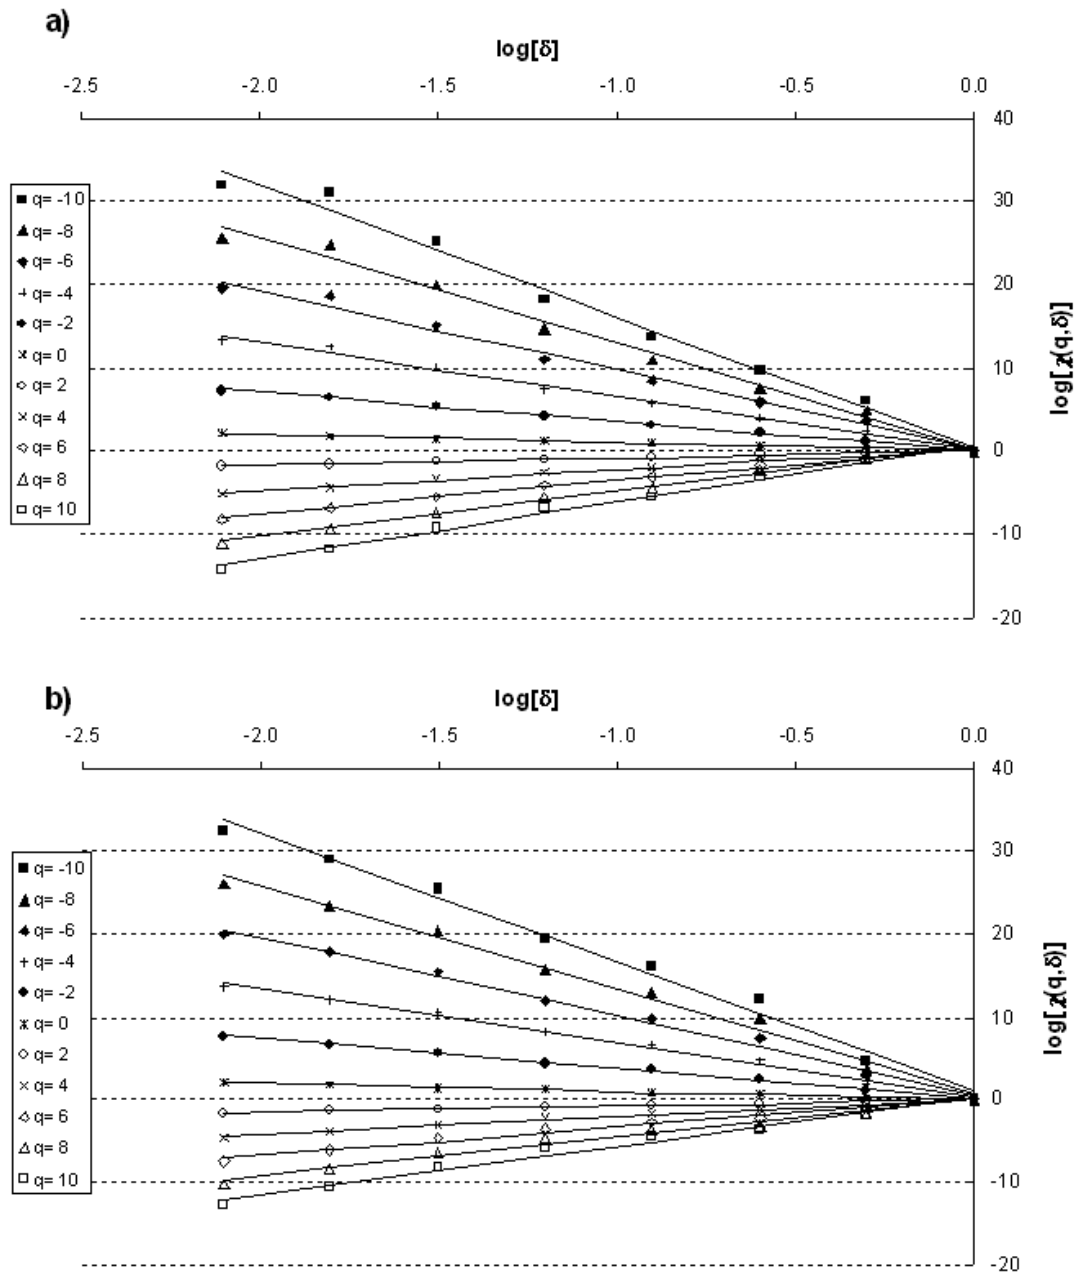



**Figure S2.** Mass exponents,  $\tau(q)$ , of soil water content averaged from 20 to 60 cm depth for rain-fed and irrigation treatments in 2011 and 2012.

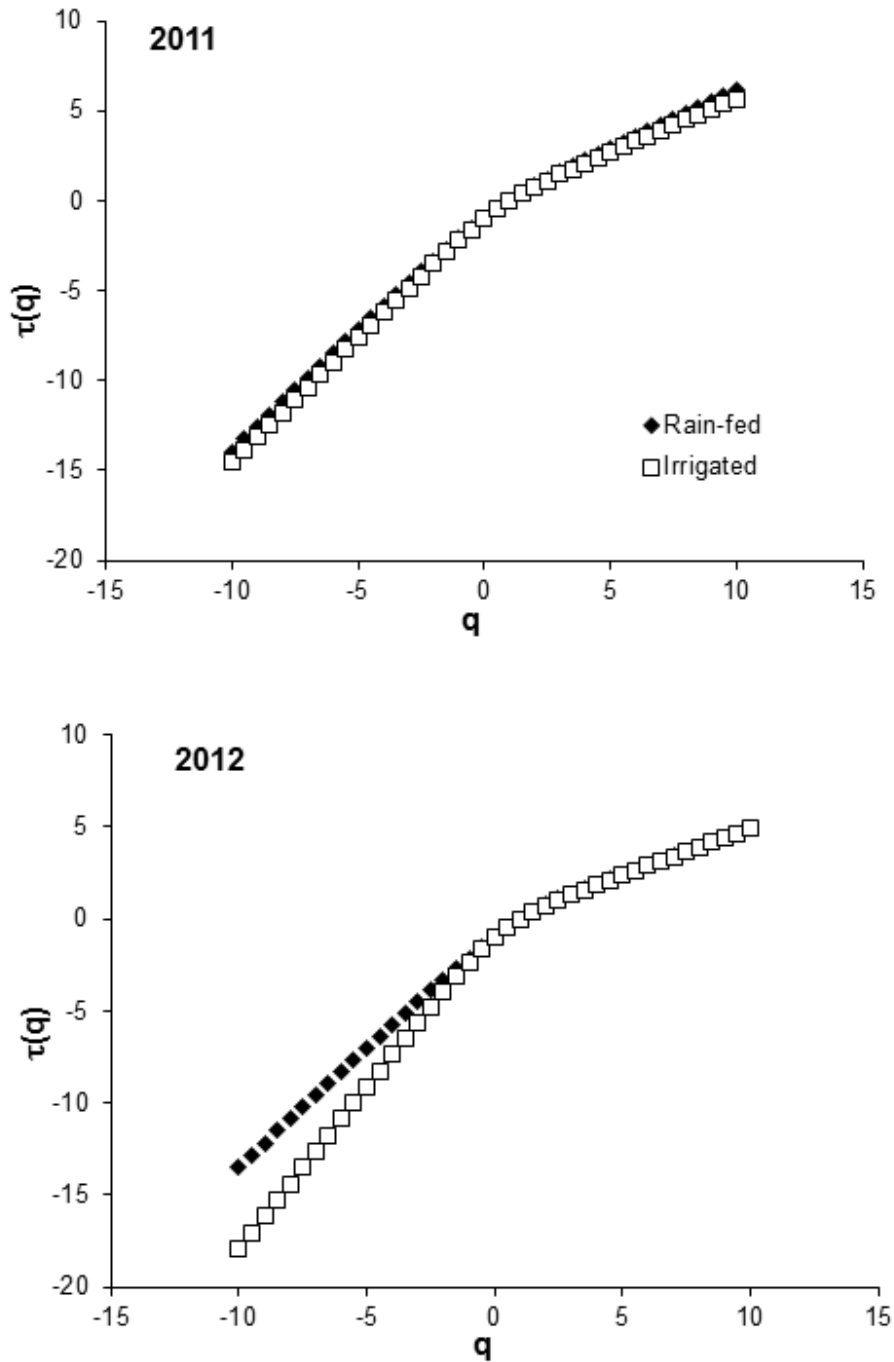

Supplement: Supplementary file [file npg-2016-14-AC1-supplement.pdf]
